# Supplementary material for: The role of π-blocking hydride ligands in a pressure-induced insulator-to-metal phase transition in SrVO2H
Source: PubMed Central journal article supplement (PMC5663929; doi:10.1038/s41467-017-01301-0), 2017-10-31
Supplement: 41467_2017_1301_MOESM1_ESM.pdf [file 41467_2017_1301_MOESM1_ESM.pdf]

## Supplementary Information

### Supplementary Note 1. Sample dependence of Diffraction and Resistivity measurements

In the experimental component of this work, we have used two different samples of SrVO<sub>2</sub>H, SrVO<sub>2</sub>H-A and SrVO<sub>2</sub>H-B. The structural results reported in Fig. 2 of the main text relate to SrVO<sub>2</sub>H-A, where a small amount (~14%) of SrVO<sub>3</sub> impurity was found to be present. The impurity peaks, identified by comparison to pure SrVO<sub>3</sub> (Supplementary Fig. 1), are clearly identifiable in Figure 2a, and do not adversely affect the analysis of the diffraction data. However, initial measurements of the resistivity of sample SrVO<sub>2</sub>H-A showed only rather weak dependence on pressure and temperature (Supplementary Fig. 5, a,b,c). We therefore synthesized a second sample, SrVO<sub>2</sub>H-B, which had fewer impurities present, and conducted pressure- and temperature-dependent resistivity experiments. The X-ray data for the two samples are compared in Supplementary Fig. 1. The reproducibility was checked by measuring the resistivity twice using different batches of SrVO<sub>2</sub>H-B (Fig. 3 in the main text and Supplementary Fig. 4). The resistivity of SrVO<sub>2</sub>H-B is substantially higher than that for SrVO<sub>2</sub>H-A, and the pressure and temperature dependences span 2 orders of magnitude more. Nevertheless, the trend towards a more highly conducting state with increased pressure is apparent in both data sets.

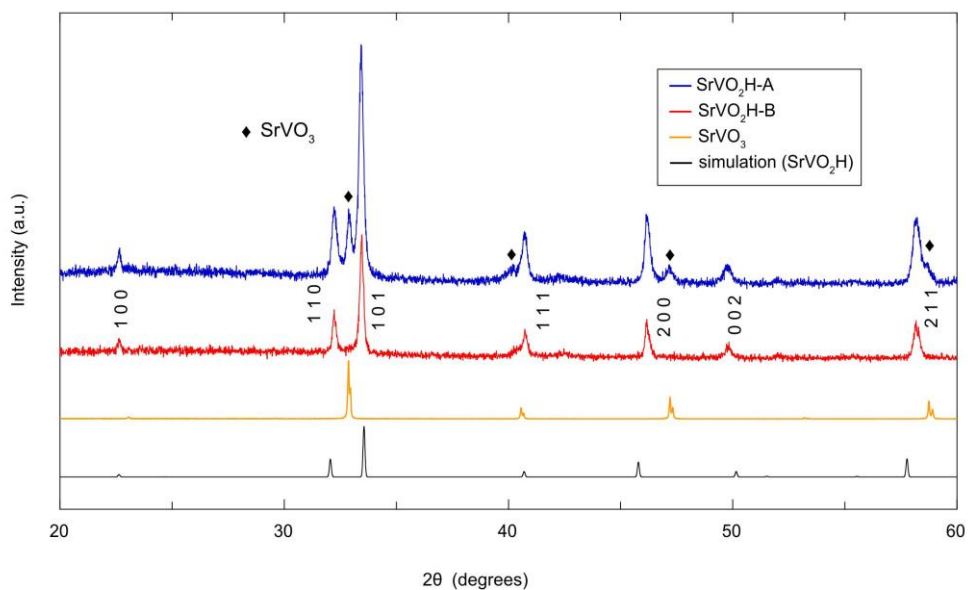

**Supplementary Figure 1. XRD patterns of SrVO<sub>2</sub>H.** XRD patterns of SrVO<sub>2</sub>H-A (blue), SrVO<sub>2</sub>H-B (red) and SrVO<sub>3</sub> (orange) and simulation pattern for SrVO<sub>2</sub>H (black). Data were measured on a D8 ADVANCE diffractometer (Bruker AXS) with Cu-K $\alpha$  radiation. SrVO<sub>2</sub>H-A and SrVO<sub>2</sub>H-B were used for resistivity measurements. SrVO<sub>2</sub>H-A contains unreduced SrVO<sub>3</sub> impurity with 14% of molar fraction.

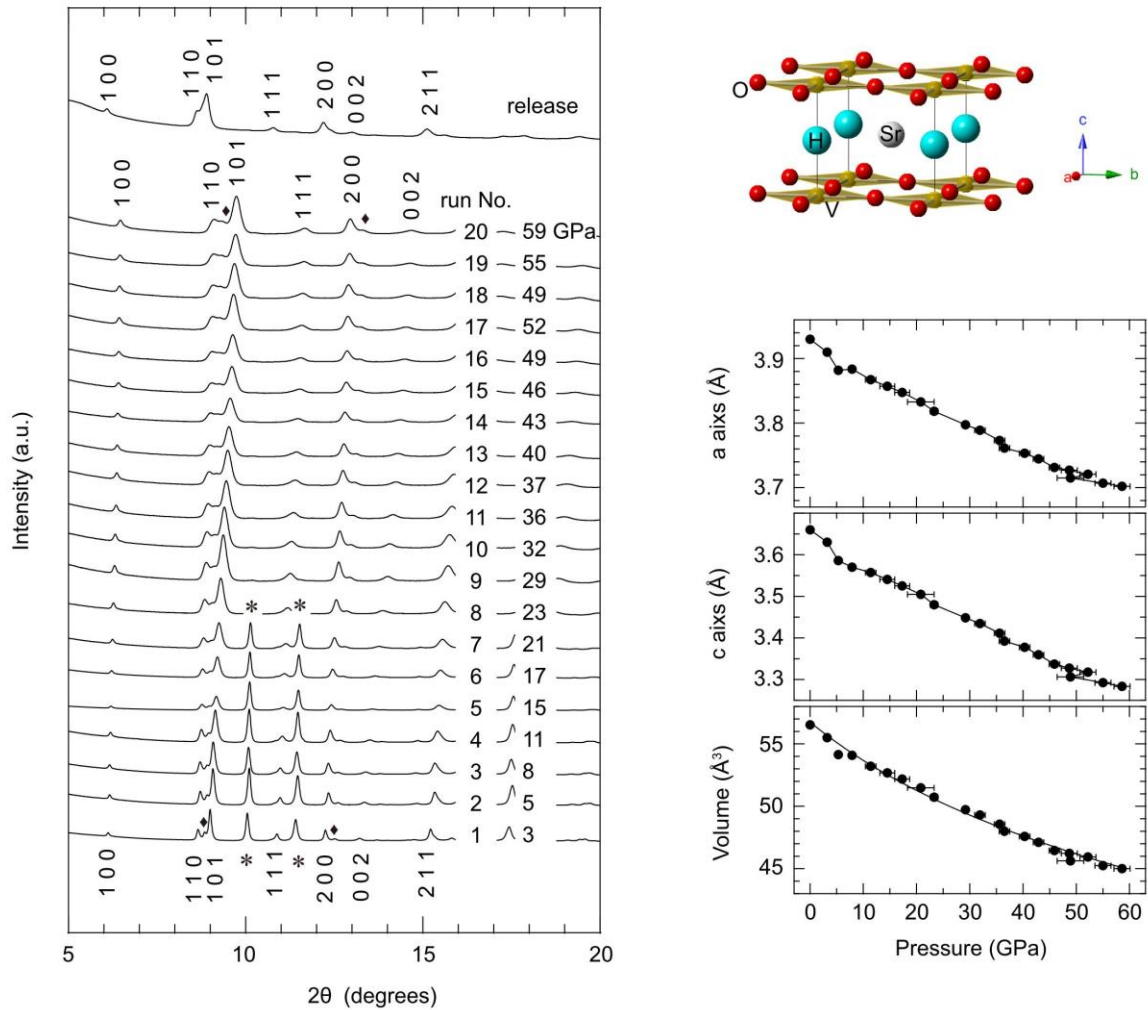

**Supplementary Figure 2. High pressure XRD experiments on SrVO<sub>2</sub>H.** (left) Powder synchrotron XRD patterns of sample SrVO<sub>2</sub>H-A under pressure at room temperature ( $\lambda = 0.4173 \text{ \AA}$ ). All patterns could be indexed on the basis of the tetragonal unit cell. The symbols  $\blacklozenge$  and  $*$  correspond to SrVO<sub>3</sub> and rhenium from the gasket, respectively. (right) Pressure dependence of the lattice parameters and the volume. The solid line in the volume plot represents the Birch-Murnaghan fitting with bulk modulus  $K$  of 160(5) GPa.

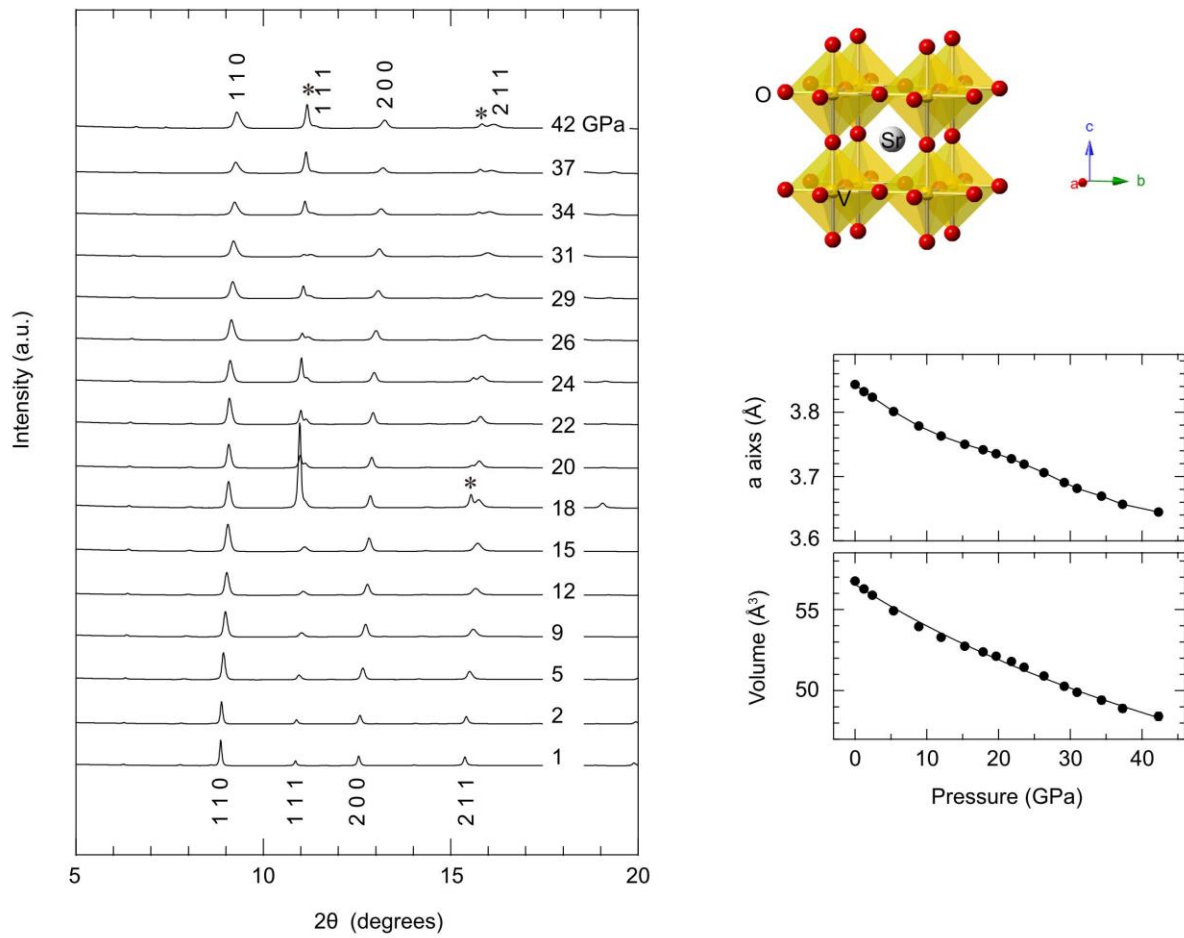

**Supplementary Figure 3. High pressure XRD experiments on SrVO<sub>3</sub>.** (left) Powder synchrotron XRD patterns under pressure at room temperature ( $\lambda = 0.4186 \text{ \AA}$ ). The patterns can be indexed using a cubic cell. \* corresponds to tungsten-rhenium alloy from gasket. (right) Pressure dependence of the lattice parameters and the volume. Solid line in volume represents Birch-Murnaghan fitting with bulk modulus  $K$  of 196(4) GPa.

## Supplementary Note 2. Linearized Birch-Murnaghan fitting and zero-pressure linear compressibility $\beta$

Linearized Birch-Murnaghan equation of state:

$$P = \frac{3}{2}K_{l0} \left[ \left(\frac{l_0}{l}\right)^7 - \left(\frac{l_0}{l}\right)^5 \right] \times \left\{ 1 - \frac{3}{4}(4 - K_l') \times \left[ \left(\frac{l_0}{l}\right)^2 - 1 \right] \right\} \quad (1)$$

where  $l$ ,  $K_{l0}$  and  $K_l'$  represent each axis ( $a$ ,  $b$ , and  $c$ ), the axial modulus, and the pressure derivative of the  $l$ -axis.  $K_l'$  was fixed to 4 in all the fitting.

The zero-pressure linear compressibility  $\beta_l$  is determined as:

$$\beta_l = -\frac{1}{l} \left( \frac{\partial l}{\partial P} \right)_T = \frac{1}{3K_{l0}} \quad (2)$$

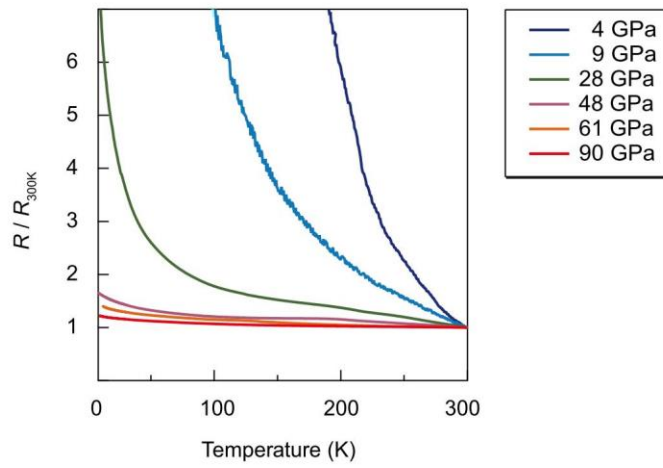

**Supplementary Figure 4. Normalized resistivity  $R/R_{300K}$  under pressure.** This data are from experiments of Fig. 3. The resistance becomes essentially independent of temperature above 48 GPa, indicating an insulator-to-metal transition.

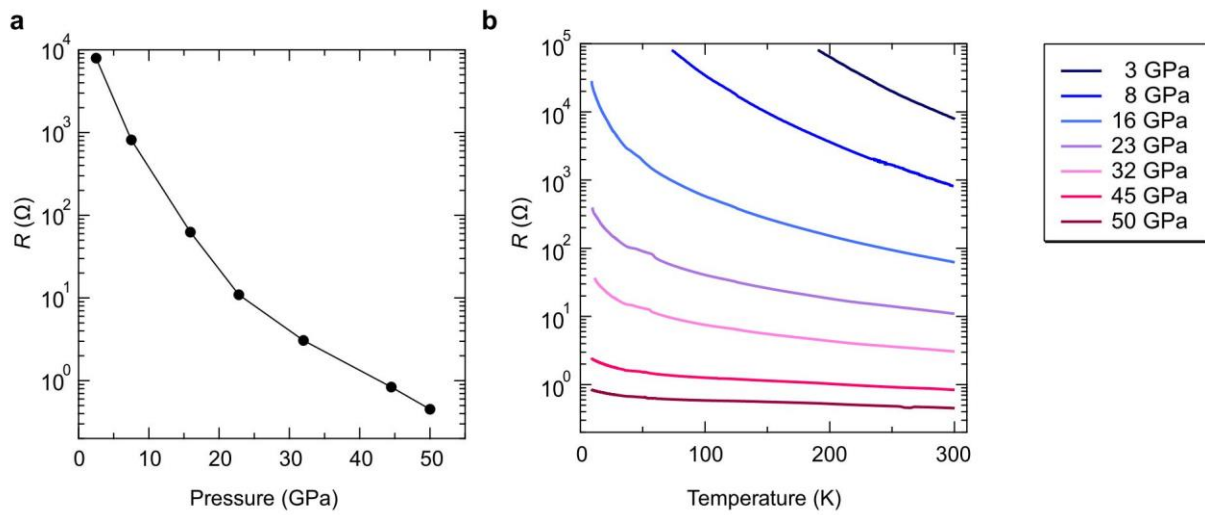

**Supplementary Figure 5. Electrical resistivity for SrVO<sub>2</sub>H-B under pressure.** Pressure dependence of resistivity  $R$  at 300 K (a), Temperature dependence of resistance (b). This measurement was a different run from that of Fig. 3. Note that this measurement reproduces the results shown in Fig. 3, but represents an independent run.

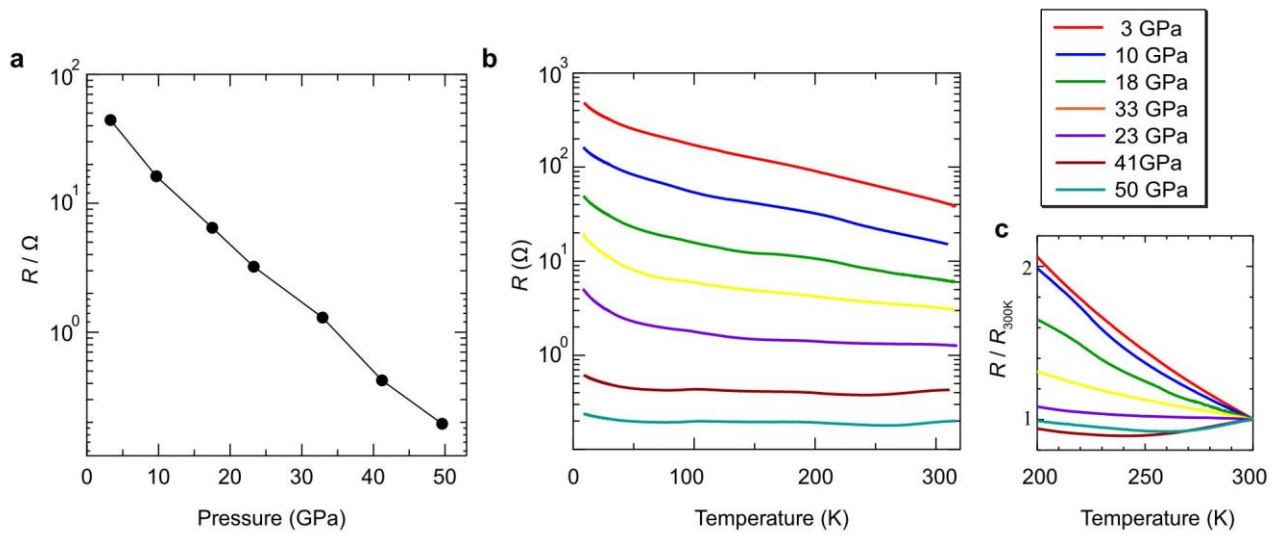

**Supplementary Figure 6. Electrical resistivity for SrVO<sub>2</sub>H-A under pressure.** Pressure dependence of resistivity  $R$  at 300 K (**a**), Temperature dependence of resistance (**b**), normalized resistivity  $R/R_{300K}$  (**c**).



### Supplementary Note 3. Anomaly in the lattice parameters

The pressure-dependence of lattice parameters is shown in Supplementary Table 1 (the corresponding XRD patterns are shown in Figure 2S). Supplementary Fig. 7 shows the pressure plotted against volume and rotation of screw. When the screw is rotated, the distance between the diamond anvils become closer and the volume of sample space decreases. So pressure generally increases when the screw is rotated. The anomaly referred to in the text corresponds run No. 18 in Supplementary Table 1 (and red circles in Supplementary Fig. 7) where the pressure drops from 52 GPa to 49 GPa. This clearly shows that the sample has become much denser in a discontinuous manner, consistent with a volume reduction at an insulator-to-metal transition. The pressure was measured using two different ruby chips and both the chips indicated a decrease of pressure. Similar behavior has been observed in Sr<sub>2</sub>PdO<sub>3</sub> at a pressure-induced structural transition (*Inorg. Chem.*, **50**, 11787–11794 (2011)).

**Supplementary Table 1.** Lattice parameters of SrVO<sub>2</sub>H

| Run No. | Rotation of screw (°) | Pressure (GPa) | <i>a</i> axis (Å) | <i>c</i> axis (Å) |
|---------|-----------------------|----------------|-------------------|-------------------|
| 0       | –                     | 0              | 3.93              | 3.66              |
| 1       | 0                     | 3.2            | 3.90995           | 3.6302            |
| 2       | 30                    | 5.3            | 3.88185           | 3.58585           |
| 3       | 45                    | 7.9            | 3.88353           | 3.56996           |
| 4       | 60                    | 11.4           | 3.86731           | 3.55725           |
| 5       | 75                    | 14.5           | 3.85712           | 3.54061           |
| 6       | 105                   | 17.3           | 3.84747           | 3.52509           |
| 7       | 120                   | 20.8           | 3.83271           | 3.50477           |
| 8       | 135                   | 23.3           | 3.8183            | 3.47979           |
| 9       | 165                   | 29.2           | 3.79735           | 3.44848           |
| 10      | 180                   | 31.9           | 3.78884           | 3.4346            |
| 11      | 195                   | 35.6           | 3.77309           | 3.4114            |
| 12      | 210                   | 36.5           | 3.76138           | 3.39232           |
| 13      | 225                   | 40.3           | 3.7533            | 3.37758           |
| 14      | 240                   | 42.9           | 3.74469           | 3.35957           |
| 15      | 255                   | 45.9           | 3.73127           | 3.33716           |
| 16      | 270                   | 48.7           | 3.72699           | 3.32747           |
| 17      | 285                   | 52.2           | 3.72088           | 3.31771           |
| 18      | 300                   | 48.9           | 3.71498           | 3.30642           |
| 19      | 315                   | 55             | 3.70701           | 3.29268           |
| 20      | 330                   | 58.6           | 3.70212           | 3.28343           |

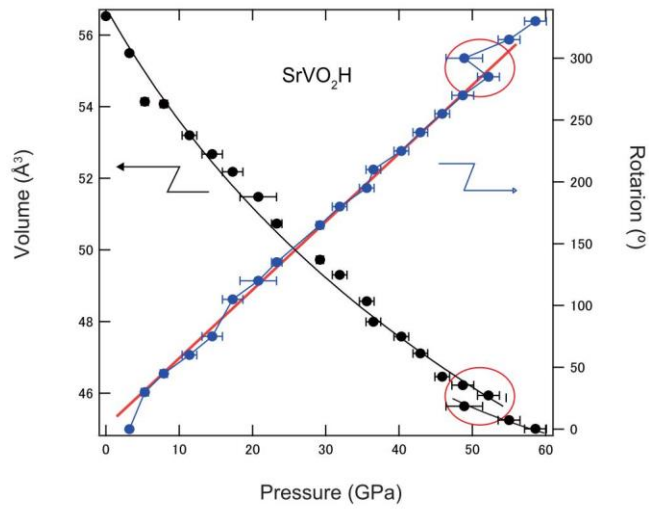

**Supplementary Figure 7. Pressure dependence of Volume and rotation of screw.** Anomaly at ~ 50 GPa (red circles) implies a phase transition. Red line represent a linear fitting curve between 5 GPa to 52 GPa.

#### Supplementary Note 4. Computational details

The  $\sqrt{2} \times \sqrt{2} \times 2$  expansion of the unit cell used in all computations is shown in Supplementary Fig. 8.

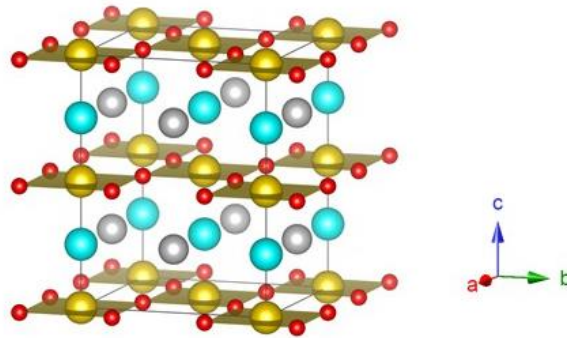

**Supplementary Figure 8.** The  $\sqrt{2} \times \sqrt{2} \times 2$  expansion of the unit cell used to explore the magnetic configurations.

**Optimized lattice parameters.** The optimized cell parameters for a  $\sqrt{2} \times \sqrt{2} \times 2$  expansion of the primitive unit cell are collected in Supplementary Table 2 for a range of  $U_{eff}$  values from 0.0 through to 5.0 eV. In all cases the optimizations correspond to the *G*-type antiferromagnetic configuration that proves to be the most stable coupling configuration. The spin densities on the vanadium centers confirm the expected increased localization of the valence electrons as  $U_{eff}$  increases, the  $U_{eff} = 5.0$  eV limit of  $\rho(V) = 1.88$  being typical of a formally  $d^2$  ion in an oxide lattice. The agreement between X-ray and optimized geometries is generally good (within 3%).

**Supplementary Table 2.** Optimized structural parameters in the *G*-type antiferromagnetic configuration of SrVO<sub>2</sub>H

| $U_{eff}$ / eV | Total Energy /eV | $a$ / Å | $c$ / Å | Mulliken Spin Density |
|----------------|------------------|---------|---------|-----------------------|
| 0.0            | -135.43          | 3.93    | 3.69    | ±1.39                 |
| 0.5            | -133.90          | 3.95    | 3.69    | ±1.56                 |
| 1.0            | -132.52          | 3.96    | 3.69    | ±1.64                 |
| 2.0            | -129.92          | 3.98    | 3.69    | ±1.73                 |
| 3.0            | -127.51          | 4.00    | 3.70    | ±1.80                 |
| 4.0            | -125.24          | 4.01    | 3.71    | ±1.84                 |
| 5.0            | -123.09          | 4.03    | 3.73    | ±1.88                 |
| Exp.           | -                | 3.93    | 3.67    | -                     |

**Exchange coupling pathways.** The nature and strength of the magnetic coupling between the vanadium centers has been discussed previously by both Wei *et al.*<sup>1</sup> and by Liu *et al.*<sup>2</sup>. The observed *G*-type antiferromagnetism indicates the presence of strong intra-layer coupling *via* the bridging oxides due efficient superexchange between the singly occupied  $3d_{xz}$  and  $3d_{yz}$  orbitals, mediated by the oxide  $2p$  orbitals. The origin of the strong inter-layer exchange is less obvious, as both  $3d_{z^2}$  orbitals are formally vacant. In order to evaluate the strength of exchange along these four distinct pathways we map the DFT-computed energies of the *G*-, *C*-, *A*-, *X*- and *F*- configurations (Supplementary Fig. 9) onto the diagonal elements of the Heisenberg Spin Hamiltonian computed in the basis of uncoupled states:

$$\hat{H}_{Heisenberg} = 2J_{ij} \sum_{j>i} \hat{\mathbf{S}}_i \cdot \hat{\mathbf{S}}_j \quad (3)$$

$J_{ij}$  is the effective exchange coupling constant between atoms  $i$  and  $j$  with  $\hat{S}_i = \hat{S}_j = 1$ . In the  $\sqrt{2} \times \sqrt{2} \times 2$  supercell defined in Supplementary Fig. 8 we can identify four symmetry-distinct exchange coupling paths,  $J_{1-4}$ :  $J_1$  corresponds to the nearest neighbor in-plane V-O-V coupling while  $J_2$ , in contrast, is the nearest neighbor inter-planar V-H-V coupling. A strontium cation lies directly along the line of the  $J_3$  pathway while there is no bridging ion at all directly along the  $J_4$  pathway. Our computed values of  $J_1 = 20.0$  meV;  $J_2 = 4.5$  meV;  $J_3 = 0.9$  meV;  $J_4 = 0.2$  meV ( $U_{eff} = 2.0$  eV) confirm that the interactions  $J_3$  and  $J_4$  are small and can safely be neglected in this analysis. Like Wei and Liu, we conclude that the experimentally observed *G*-type antiferromagnet<sup>3</sup> is the most stable configuration, with stronger coupling in the *ab*-plane (V–O–V,  $J_1 = 20.0$  meV) than along the *c*-axis (V–H–V,  $J_2 = 4.5$  meV). The large antiferromagnetic  $J_1$  is a result of strong superexchange between the singly occupied  $d_{xz/yz}$  orbitals, mediated by O  $p_z$ , and is to be anticipated based on the Goodenough-Kanamori rules<sup>4</sup>. The rather large value for  $J_2$ , the inter-planar exchange coupling, is in contrast somewhat unexpected given that the V-H-V coupling pathway *via* the metal  $d_{z^2}$  orbitals corresponds to a formally ‘empty-empty’ interaction, which usually leads to only weak coupling. Nevertheless, our value of  $J_2$  is consistent with those reported previously by both Wei *et. al* and by Liu *et. al*. Wei *et al.* have argued for direct through-space interactions between the two vanadium centers along *c*, although the V–V separation along the *c*-axis is greater than the bonding distance in, *e.g.*, VO<sub>2</sub>, suggesting that such overlap should be rather small. An alternative explanation comes from the significant covalent

character of the V–H bonds. The Goodenough-Kanamori rules predict an antiferromagnetic contribution to the coupling in this case because charge transfer from H 1s to the vacant V  $d_{z^2}$  orbitals is most efficient when the two electrons in the hydride 1s orbital are transferred to different metal centers. In a ferromagnetic arrangement, in contrast, only one of the H 1s electrons can undergo a virtual transfer to the metal  $3d_{z^2}$  (Supplementary Fig. 10). Similar factors lead to the high ordering temperature in  $\text{LaSrCoO}_3\text{H}_{0.7}$ <sup>5</sup>.

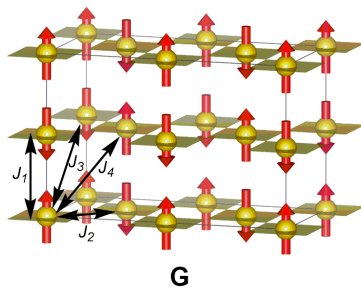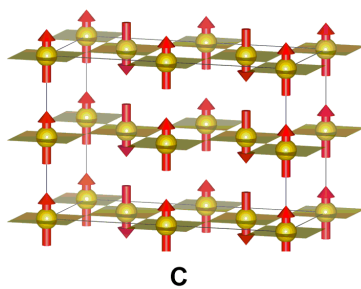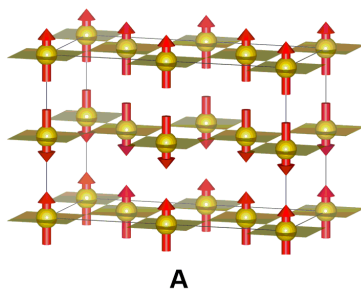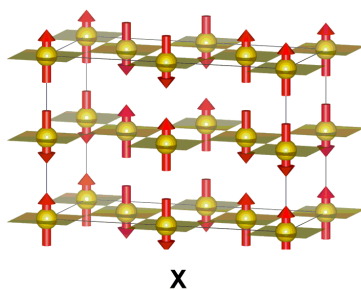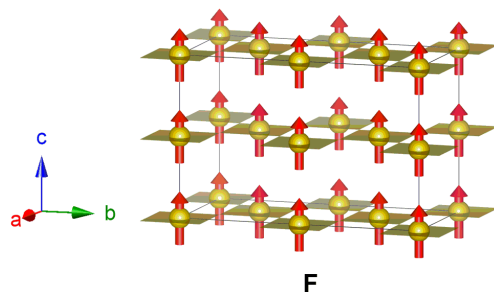

**Supplementary Figure 9.** *G*-, *C*-, *A*-, *X*- and *F*- configurations.

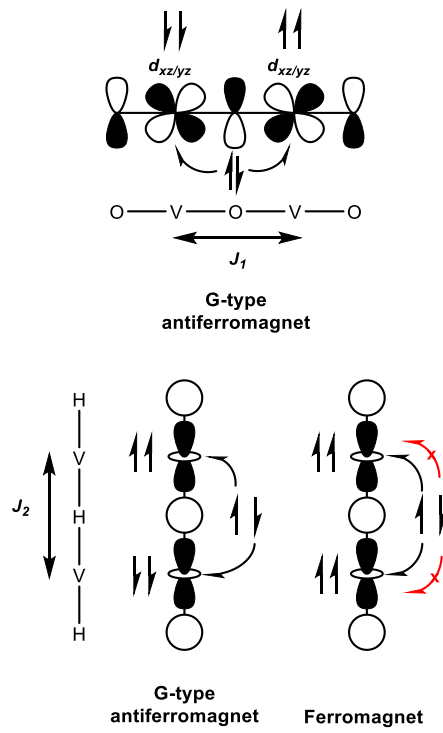

**Supplementary Figure 10.** Schematic picture of exchange coupling pathways for the intra-plane and inter-plane antiferromagnetism.



**Pressure dependence of the band structure.** In the main text, we showed that application of pressure causes a contraction along both  $c$  and  $a$ , and that this leads to a transition to a metallic state above 50 GPa. In order to separate out the roles of compression along  $c$  and compression along  $a$  in forcing this transition, we have performed a series of calculations where the  $c$  and  $a$  lattice parameters are constrained at different values that fall between the high- and low-pressure limits (Supplementary Fig. 11). The important point to emerge from this figure is that compression along  $c$  alone does not induce a transition to a metallic state, even at the shortest distances. In contrast, compression along  $a$  does cause a metallic state to form, even when  $c$  remains at its ambient pressure value. From this, we conclude that compression along  $a$  is more important in the phase transition, even though it is smaller in absolute terms than compression along  $c$ .

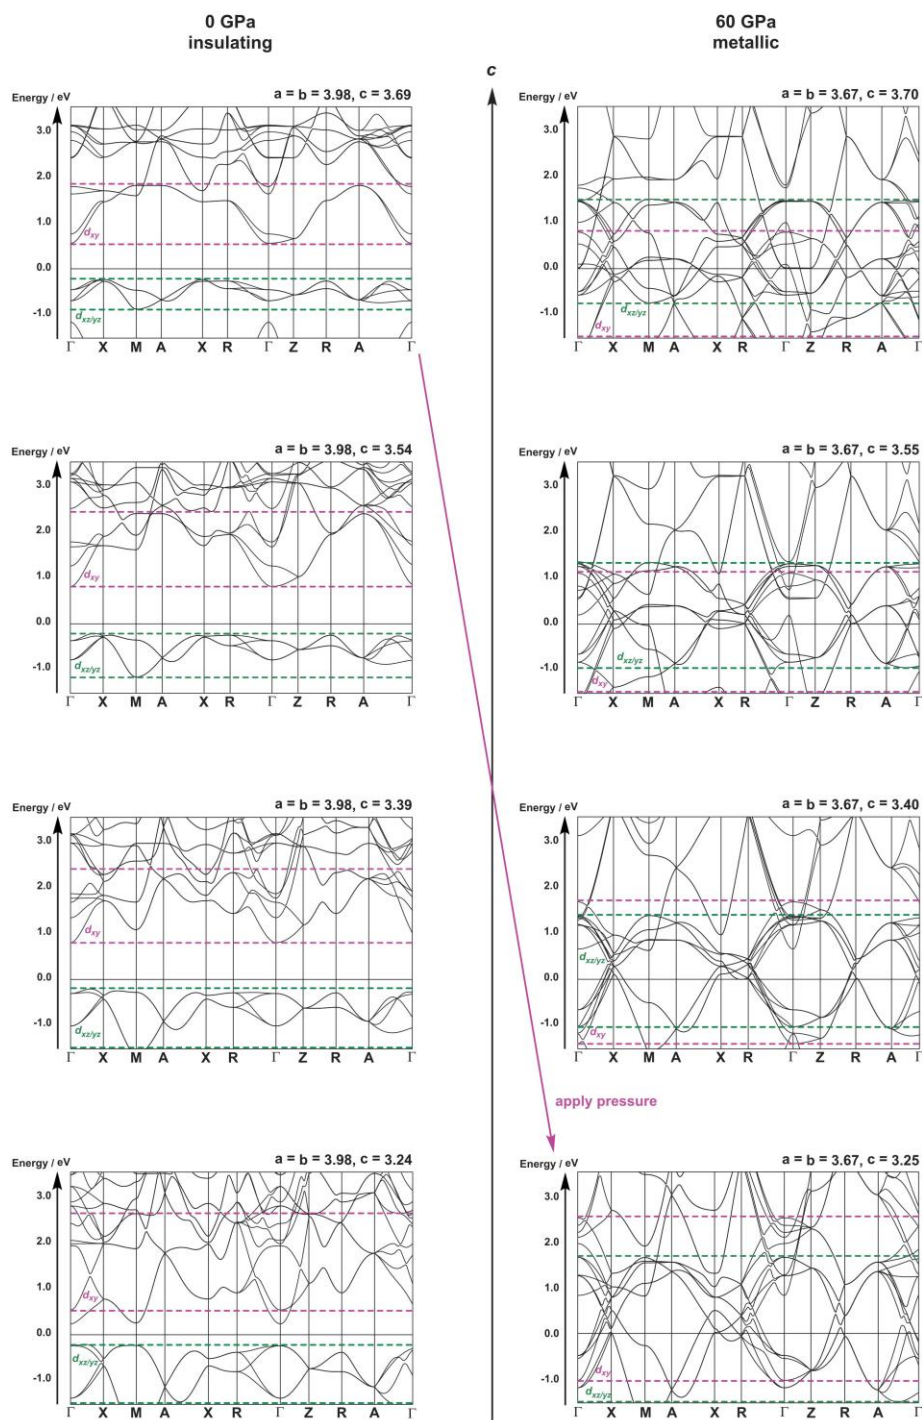

**Supplementary Figure 11.** Variation of band structure as a function of lattice parameters  $c$  and  $a$  (in Å).

**Influence of choice of methodology on the electronic structure analysis.** We have noted above that the choice of Hubbard  $U_{eff}$ , makes subtle differences to the computed ground-state electronic structure at ambient pressure. Increasing  $U_{eff}$ , increases the spin density on the vanadium centers and increases the lattice parameters,  $a$  and  $c$ . The density of states plots as a function of pressure for  $U_{eff} = 0, 2.0$  and  $4.0$  eV in Supplementary Fig. 12 show that increasing  $U_{eff}$  increases the band gap at ambient pressure, and therefore pushes the insulator-to-metal transition to higher pressures. Thus even at 60 GPa, the  $U_{eff} = 4.0$  eV calculations predict an insulating state with a finite band gap. An alternative strategy that does not require a parameter choice is to use a hybrid functional such as HSE06, which in principle alleviates some of the self-interaction error that compromises the accuracy of the band gap in GGA functionals such as PBE. The density of states computed with the HSE06 functional are rather similar to those obtained with  $U_{eff} = 4.0$  eV across the entire pressure range, and indeed the system remains insulating even at 60 GPa. Despite the absolute differences in these plots, it is clear that the effect of pressure is qualitatively the same in all cases: the dominant feature is the greater dispersion in the  $d_{xy}$  conduction band. Thus while the exact value of the critical pressure is strongly dependent on methodology, the conclusions regarding the underlying mechanism are not.

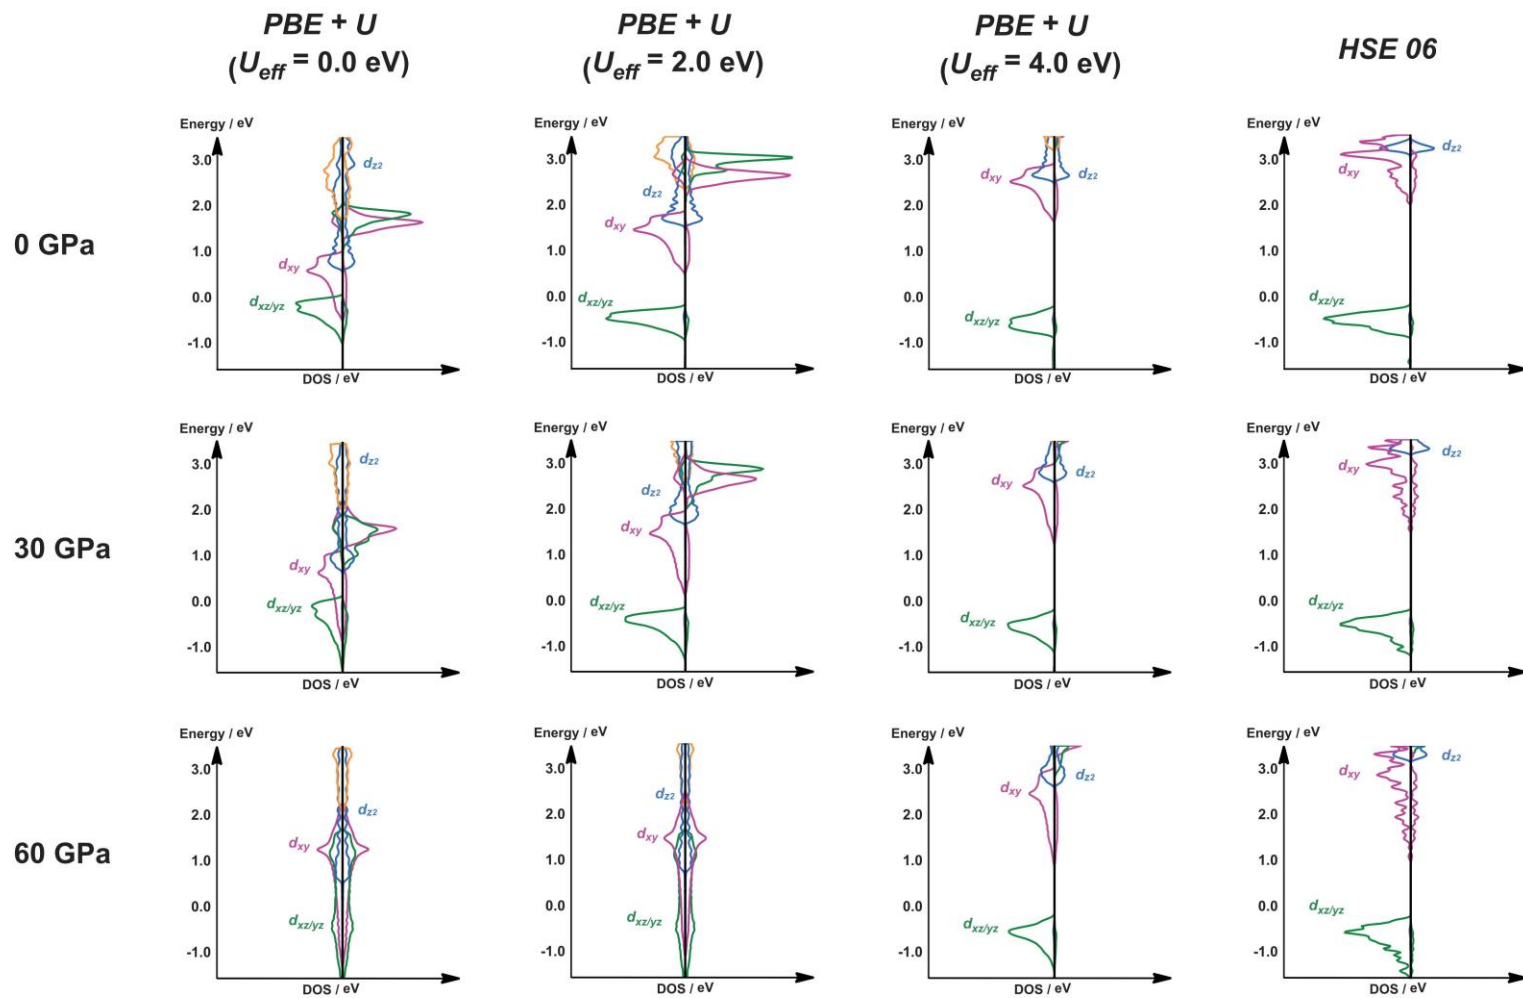

Supplementary Figure 12. Pressure-dependent density of states computed using different computational protocols.

The calculation of the transmission spectrum for the metallic state necessitated a change in methodology, from a plane-wave basis as used in VASP to a localized basis set in AtomwiseToolKit (ATK). Before analyzing the transmission, we therefore need to establish that the two codes are giving a quantitatively similar description of the electronic structure. The total DOS for the system computed with VASP and ATK (for the 60GPa structure optimized with the former) are shown in Supplementary Figure 13, and are almost identical. We are therefore confident that the transmission spectrum from ATK can be mapped onto the projected DOS computed using VASP.

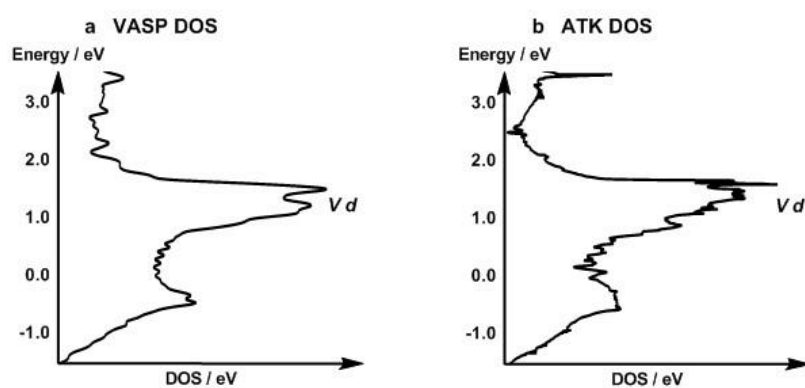

**Supplementary Figure 13.** Comparison of the density of states obtained from VASP and ATK (both with the PBE functional and  $U_{eff} = 2.0$  eV).

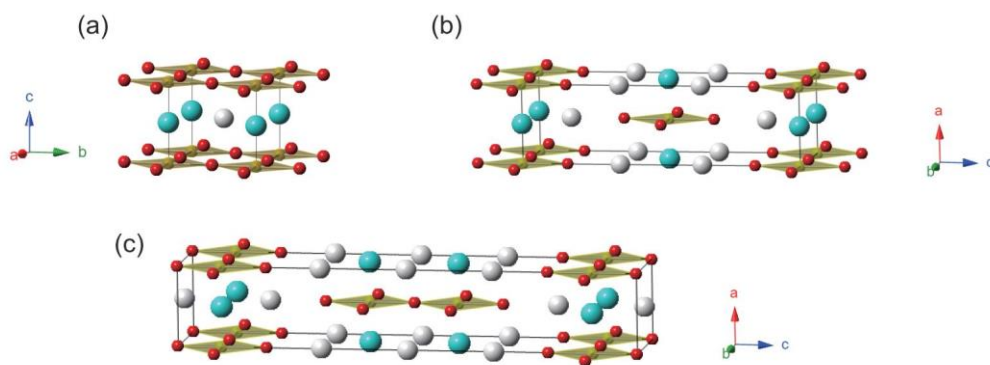

**Supplementary Figure 14. Crystal structures of  $\text{Sr}_{n+1}\text{V}_n\text{O}_{2n+1}\text{H}_n$  ( $n = 1, 2, \infty$ ).** **a**,  $\text{SrVO}_2\text{H}$  ( $n = \infty$ ), **b**,  $\text{Sr}_2\text{VO}_3\text{H}$  ( $n = 1$ ), **c**,  $\text{Sr}_3\text{V}_2\text{O}_5\text{H}_2$  ( $n = 2$ ). White, yellow, red, and sky blue spheres respectively denote Sr, V, O, H atoms.

### Supplementary references

- 1 Wei, Y., Gui, H., Li, X., Zhao, Z., Zhao, Y. H. & Xie, W. The effect of hydrogen ordering on the electronic and magnetic properties of the strontium vanadium oxyhydride. *J. Phys. Condens. Matter* **27**, 206001 (2015).
- 2 Liu, K., Hou, Y. S., Gong, X. G. & Xiang, H. J. Orbital delocalization and enhancement of magnetic interactions in perovskite oxyhydrides. *Sci. Rep.* **6**, 19653 (2016).
- 3 Denis Romero, F., Leach, A., Moller, J. S., Foronda, F., Blundell, S. & Hayward, M. A. Strontium vanadium oxide-hydrides: ‘square-planar’ two-electron phases. *Angew. Chem. Int. Ed.* **53**, 7556–7559 (2014).
- 4 Goodenough, J. B. *Magnetism and the Chemical Bond*; Interscience: New York; London, 1963.
- 5 Bridges, C. A., Darling, G. R., Hayward, M. A. & Rosseinsky, M. J. Electronic structure, magnetic ordering, and formation pathway of the transition metal oxide hydride  $\text{LaSrCoO}_3\text{H}_{0.7}$ . *J. Am. Chem. Soc.* **127**, 5996–6011 (2005).
